# Supplementary material for: A 10 m resolution land cover map of the Tibetan Plateau with detailed vegetation types
Source: Copernicus journal article supplement (doi:10.5194/essd-2023-327), 2023-09-19
Supplement: Supplementary file [file essd-2023-327-AC1-supplement.pdf]

# **A 10 m resolution land cover map of the Tibetan Plateau with detailed vegetation types**

Anonymous Referee #2

## **General comments:**

**This manuscript ‘A 10 m resolution land cover map of the Tibetan Plateau with detailed vegetation types’ produced a 10 m resolution TP land cover map to address the issue of low spatial resolution and incomplete vegetation type coverage in the existing TP land cover dataset. The generated TP\_LC10-2022 product will be a valuable data for the study of this region, but the method employed in the manuscript lacks innovation. In addition, there are still many areas that need improvement.**

**Response:** We are grateful for your kind acknowledgment of the value of our dataset and thank you for providing insightful comments and detailed suggestions. Following your constructive feedback, we have revised the text to strengthen the clarity and accuracy of this manuscript.

It is very true that the classification methods used in this study are widely used but also well recognized in the research community. We believe that in the current stage, with the rapid advance of machine learning algorithms and computing power, the size, accuracy, and separability of the training samples are more important than the classification algorithms employed. Therefore, in this study, we emphasize more on bridging the gaps between existing land cover products and the requirements of ecologically meaningful applications in TP, that is, the new classification system. Yet, we also tested several machine-learning algorithms and selected the best one to achieve high classification accuracy.

## **Specific comments:**

- 1. First, it is recommended to separate the data and methods sections. The current structure is somewhat confusing. It is suggested to merge sections 2.1 to 2.2 under the main heading "2. Study Area and Data." Also, starting from section 2.3 to 2.3.5, it is suggested to be included in Section 3 as "3. Methodology."**

## **Reply 1:**

Thank you for the insightful suggestion. We have incorporated your feedback by consolidating sections 2.1 to 2.2 into the main heading "2. Study Area and Data." Furthermore, sections 2.3 to 2.3.5 have been integrated into section 3, resulting in a clearer and more cohesive structure. Please refer to our revised manuscript.

2. Secondly, in section 2.3.1, why did the authors state "The advantages of our classification system are as follows"? Here, the authors should introduce the basis for constructing this classification system, rather than directly discussing its advantages. Moreover, the content of this section seems more like it is introducing the basis for constructing the classification system. Moreover, what exactly is the content "Discriminability in Remote Sensing Imagery" trying to state? Is this part related to the classification system? Furthermore, didn't the authors developed their product using Sentinel data? How come 0.3m of Google Earth imagery was involved here?

**Reply 2:**

Thanks for this detailed and constructive comment. We agree that section 2.3.1 is a description of the basis of our classification system. We have revised the text in this section accordingly (Lines 116-117).

The section titled "Discriminability in Remote Sensing Imagery" did relate to the classification system. To make it clearer, we have rephrased the sentence to "Discriminability of different vegetation functional types in remote sensing imagery". Here, we aimed to demonstrate the effectiveness of our classification system during the image interpretation stage. Google Earth imagery serves as a valuable resource for distinguishing various land cover types due to its high resolution. Obtaining a substantial number of land cover samples, particularly in remote areas of the TP, would be nearly impossible without access to such high-resolution remote sensing images.

It is important to emphasize the significance of Sentinel-2 data, particularly in discriminating land cover types during the image classification stage. The multispectral bands provided by Sentinel-2 are crucial for accurately classifying diverse land cover types within the TP. To address this concern, we have incorporated additional information regarding Sentinel-2 data in the revised text (Lines 126-131), which reads:

*During the classification stage, we can effectively differentiate various land cover types, including diverse vegetation, utilizing the discriminative capabilities of the multispectral bands of Sentinel-2 (Liu et al., 2023). Moreover, the incorporation of high-resolution Google Earth imagery, with a spatial resolution of up to 0.3 meters, enhances the discernibility of land cover types during the sample selection phase. This ensures the feasibility of visually interpreting large-scale samples from remote sensing imagery and obtaining reliable and up-to-date information (Gong et al., 2013).*

**Reference:**

Gong, P., Wang, J., Yu, L., Zhao, Y., Zhao, Y., Liang, L., Niu, Z., Huang, X., Fu, H., Liu, S., Li, C., Li, X., Fu, W., Liu, C., Xu, Y., Wang, X., Cheng, Q., Hu, L., Yao, W., ... Chen, J. (2013). Finer resolution observation and monitoring of global land cover: First

mapping results with Landsat TM and ETM+ data. *International Journal of Remote Sensing*, 34(7), 2607–2654. <https://doi.org/10.1080/01431161.2012.748992>

Liu, X., Frey, J., Munteanu, C., Still, N., & Koch, B. (2023). Mapping tree species diversity in temperate montane forests using Sentinel-1 and Sentinel-2 imagery and topography data. *Remote Sensing of Environment*, 292, 113576. <https://doi.org/10.1016/j.rse.2023.113576>

**3. Thirdly, why were the training and validation sets configured as 4:1? Typically, they are set to 7:3.**

**Reply 3:**

Considering that we derived 22 features for the classification and the land cover in the TP is highly heterogeneous, the machine learning model needs to learn the complex distribution of different data features. Compared to the case of a 7:3 ratio, 80% of the data is used to train the model, which allows the model to better learn the features and patterns of the data and improve the model's fitting ability (Ramezan et al., 2021). We have added an explanation of the ratio of training and validation sets (Lines 177-179), which reads:

*We adjusted the ratio of training to validation samples to 4:1 instead of the commonly used 7:3 to enhance the model's fitting capability to handle the complex distribution of features (Ramezan et al., 2021).*

**Reference:**

Ramezan, C. A., Warner, T. A., Maxwell, A. E., & Price, B. S. (2021). Effects of Training Set Size on Supervised Machine-Learning Land-Cover Classification of Large-Area High-Resolution Remotely Sensed Data. *Remote Sensing*, 13(3), 368. <https://doi.org/10.3390/rs13030368>

**4. Fourth, the content within Section 2.3.3, from "Interannual remote sensing" to "The median compositing method in GEE was applied to process all bands of Sentinel-1 and Sentinel-2," is suggested to be included in Section 2.2.1. The corresponding preprocessing is suggested to describe in the presentation of the Sentinel-2 data.**

**Reply 4:**

Thank you for this constructive suggestion. The corresponding content has been included in Section 2.2.1 and the detailed preprocessing has been described in the presentation of Sentinel data (Lines 74-88), which reads:

*We used both the optical imagery from Copernicus Sentinel-2 and radar imagery from Copernicus Sentinel-1 for the classification. Sentinel-2 comprises two high-resolution multispectral imaging satellites, each equipped with a multispectral imager. It consists of 13 bands, with spatial resolutions of 10 m for 4 bands, 20 m for 6 bands, and 60 m for 3 bands. The study utilized Level-2A products from the year 2022, which*

had undergone processing via the Sen2Cor tool at the Copernicus Scientific Data Hub (Doxani et al., 2018). Annual remote sensing images have proven to accurately capture phenological changes in specific vegetation cover and have been successfully utilized in various large-scale land cover classification studies (Verde et al., 2020). Hence, in this study, the Sentinel-2 remote sensing images from the entire year of 2022 were selected for band feature extraction. In this study, the initial step involved retaining the images with a cloud cover of less than 10%. Subsequently, the quality assessment information (QA band) was utilized to exclude pixels with inadequate quality through cloud masking.

Sentinel-1 comprises two polar-orbiting satellites positioned in the same orbital plane. For this research, the Ground Range Detected (GRD) data obtained in wide swath (IW) mode was chosen. The GRD data consists of single polarization (VV) and dual polarization (VV, VH) interferometric wave modes, offering a 10 m resolution (Prats-Iraola et al., 2015). It enables the provision of radar images suitable for land and maritime services, regardless of weather conditions and time of day. The median compositing method in GEE (Souza Jr et al., 2020; Phan et al., 2020) was applied to process all bands of Sentinel-1 and Sentinel-2.

## Reference:

- Doxani, G., Vermote, E., Roger, J.-C., Gascon, F., Adriaensen, S., Frantz, D., Hagolle, O., Hollstein, A., Kirches, G., Li, F., Louis, J., Mangin, A., Pahlevan, N., Pflug, B., & Vanhellemont, Q. (2018). Atmospheric Correction Inter-Comparison Exercise. *Remote Sensing*, 10(3), 352. <https://doi.org/10.3390/rs10020352>
- Phan, T. N., Kuch, V., & Lehnert, L. W. (2020). Land Cover Classification using Google Earth Engine and Random Forest Classifier-The Role of Image Composition. *Remote Sensing*, 12(15), 2411. <https://doi.org/10.3390/rs12152411>
- Prats-Iraola, P., Nannini, M., Scheiber, R., De Zan, F., Wollstadt, S., Minati, F., Vecchioli, F., Costantini, M., Borgstrom, S., De Martino, P., Siniscalchi, V., Walter, T., Fomelis, M., & Desnos, Y.-L. (2015). Sentinel-1 assessment of the interferometric wide-swath mode. 2015 IEEE International Geoscience and Remote Sensing Symposium (IGARSS), 5247–5251. <https://doi.org/10.1109/IGARSS.2015.7327018>
- Souza Jr, C. M., Shimbo, J. Z., Rosa, M. R., Parente, L. L., Alencar, A. A., Rudorff, B. F. T., Hasenack, H., Matsumoto, M., Ferreira, L. G., Souza-Filho, P. W. M., de Oliveira, S. W., Rocha, W. F., Fonseca, A., Marques, C. B., Diniz, C. G., Costa, D., Monteiro, D., Rosa, E. R., Velez-Martin, E., ... Azevedo, T. (2020). Reconstructing Three Decades of Land Use and Land Cover Changes in Brazilian Biomes with Landsat Archive and Earth Engine. *Remote Sensing*, 12(17), 2735. <https://doi.org/10.3390/rs12172735>
- Verde, N., Kokkoris, I. P., Georgiadis, C., Kaimaris, D., Dimopoulos, P., Mitsopoulos, I., & Mallinis, G. (2020). National Scale Land Cover Classification for Ecosystem Services Mapping and Assessment, Using Multitemporal Copernicus EO Data and Google Earth Engine. *Remote Sensing*, 12(20), 3303. <https://doi.org/10.3390/rs12203303>

**5. Fifth, Table 2 requires an explanation for the choice of features, particularly why all bands of Sentinel-2 are utilized. For example, Band 9 is more commonly used for atmospheric monitoring applications and has a resolution of only 60 meters, so why is it included? Additionally, is it truly beneficial to resample coarse-resolution data (kilometer-scale) like CHIRPS and ERA5 to 10 meters and include them as classification features? Such coarse-resolution data may increase the "mosaic effect" of the classification results. But the most surprising thing is that the authors have clearly indicated that the temporal and phenological features can significantly help to distinguish different categories! However, it is surprising that the authors only used the median composited bands as input features instead of using temporal features. Especially for the distinction between deciduous and evergreen vegetation, is it really possible to do it by median composites alone? Furthermore, as can be seen in Figure 3, the distinction between shrubs and woodlands is quite difficult, even when relying on temporal features. Therefore, I am skeptical about the classification accuracy of these last features.**

**Reply 5.1:**

We value the reviewer's insightful suggestion to explain the selection of features. Sentinel-2's Band 9 yields varying values across different land cover regions, including bare soil and vegetation-covered areas (Y. Zhao et al., 2023), thereby offering additional spectral information in classification. We have added a more detailed explanation for clarification in the revised manuscript (Lines 181-186), which reads:

*The selected input bands for Sentinel-2 included B2-B8, B8A, B9, B11, and B12. Among these bands, B2-B8, B11, and B12 have been demonstrated to be effective in classifying deciduous and coniferous tree species (Immitzer et al., 2016; C. Li et al., 2021). Additionally, B8A is suitable for boreal landscape classification (Abdi, 2020), while B9 values demonstrate differences between bare soil and vegetation-covered areas (Zhao et al., 2023), making them useful for classification purposes. For Sentinel-1 images, utilizing both VV and VH can enhance classification accuracy, leading to their selection as input features (Jacob et al., 2020; Steinhausen et al., 2018).*

**Reference:**

- Abdi, A. M. (2020). Land cover and land use classification performance of machine learning algorithms in a boreal landscape using Sentinel-2 data. *Giscience & Remote Sensing*, 57(1), 1–20. <https://doi.org/10.1080/15481603.2019.1650447>
- Immitzer, M., Vuolo, F., & Atzberger, C. (2016). First Experience with Sentinel-2 Data for Crop and Tree Species Classifications in Central Europe. *Remote Sensing*, 8(3), 166. <https://doi.org/10.3390/rs8030166>
- Jacob, A. W., Vicente-Guijalba, F., Lopez-Martinez, C., Lopez-Sanchez, J. M., Litzinger, M.,

- Kristen, H., Mestre-Quereda, A., Ziolkowski, D., Lavalle, M., Notarnicola, C., Suresh, G., Antropov, O., Ge, S., Praks, J., Ban, Y., Pottier, E., Mallorqui Franquet, J. J., Duro, J., & Engdahl, M. E. (2020). Sentinel-1 InSAR Coherence for Land Cover Mapping: A Comparison of Multiple Feature-Based Classifiers. *IEEE Journal of Selected Topics in Applied Earth Observations and Remote Sensing*, 13, 535–552. <https://doi.org/10.1109/JSTARS.2019.2958847>
- Li, C., Ma, Z., Wang, L., Yu, W., Tan, D., Gao, B., Feng, Q., Guo, H., & Zhao, Y. (2021). Improving the Accuracy of Land Cover Mapping by Distributing Training Samples. *Remote Sensing*, 13(22), 4594. <https://doi.org/10.3390/rs13224594>
- Steinhausen, M. J., Wagner, P. D., Narasimhan, B., & Waske, B. (2018). Combining Sentinel-1 and Sentinel-2 data for improved land use and land cover mapping of monsoon regions. *International Journal of Applied Earth Observation and Geoinformation*, 73, 595–604. <https://doi.org/10.1016/j.jag.2018.08.011>
- Zhao, Y., Lei, S., Zhu, G., Shi, Y., Wang, C., Li, Y., Su, Z., & Wang, W. (2023). An Algorithm to Retrieve Precipitable Water Vapor from Sentinel-2 Data. *Remote Sensing*, 15(5), 1201. <https://doi.org/10.3390/rs15051201>

### Reply 5.2:

We did not observe “mosaic effect” in our final land cover map. Climate data contributes to the classification process mainly at the regional scale, for example, southeast TP is more humid than the middle and east parts of TP. At the local scale, satellite imagery and topography data play a dominant role in the classification process, while the contribution from climate data to classification is minimal. Besides, our product shows consistent finer spatial patterns at 10m resolution. For clarification, we have elaborated on this issue in the revised manuscript (Lines 255-258), which reads:

*The TP exhibits significant variations in annual rainfall and land surface temperature across its diverse regions, resulting in distinct hot and cold spots (Rao et al., 2019; Wu et al., 2019). Leveraging climate data can thus prove beneficial in categorizing alpine meadows in the southeastern TP and alpine grasslands in the northwestern TP at regional climatic scales, given their high sensitivity to changes in annual precipitation and land surface temperature (Su et al., 2020; Y. Wang et al., 2021).*

### Reference:

- Rao, Y., Liang, S., Wang, D., Yu, Y., Song, Z., Zhou, Y., Shen, M., & Xu, B. (2019). Estimating daily average surface air temperature using satellite land surface temperature and top-of-atmosphere radiation products over the Tibetan Plateau. *Remote Sensing of Environment*, 234, 111462. <https://doi.org/10.1016/j.rse.2019.111462>
- Su, Y., Guo, Q., Hu, T., Guan, H., Jin, S., An, S., Chen, X., Guo, K., Hao, Z., Hu, Y., Huang, Y., Jiang, M., Li, J., Li, Z., Li, X., Li, X., Liang, C., Liu, R., Liu, Q., ... Ma, K. (2020). An updated Vegetation Map of China (1:1000000). *Science Bulletin*, 65(13), 1125–1136. <https://doi.org/10.1016/j.scib.2020.04.004>

- Wang, Y., Xiao, J., Ma, Y., Luo, Y., Hu, Z., Li, F., Li, Y., Gu, L., Li, Z., & Yuan, L. (2021). Carbon fluxes and environmental controls across different alpine grassland types on the Tibetan Plateau. *Agricultural and Forest Meteorology*, 311, 108694. <https://doi.org/10.1016/j.agrformet.2021.108694>
- Wu, Y., Guo, L., Zheng, H., Zhang, B., & Li, M. (2019). Hydroclimate assessment of gridded precipitation products for the Tibetan Plateau. *Science of The Total Environment*, 660, 1555–1564. <https://doi.org/10.1016/j.scitotenv.2019.01.119>

### **Reply 5.3:**

Indeed, it sounds counterintuitive that we used a single median value to represent phenological patterns of different vegetation types. Evergreen and deciduous vegetation are difficult to be divided using a single remote sensing image, which highlights the significance of the utilization of multisource datasets, including satellite imagery and topographic datasets. We have explained in more detail to clarify this issue in the revised manuscript (Lines 279-292), which reads:

*The blue, red-edge, and shortwave infrared (SWIR) bands of mono-temporal median Sentinel-2 imagery have proven effective for vegetation classification, distinguishing between crop types and tree species (Immitzer et al., 2016). As shown in Fig. A4, both evergreen and deciduous vegetation exhibit similar trends in Sentinel-2 multispectral bands, yet they display significant differences in spectral reflectance values. This indicates that median composited bands of Sentinel-2, along with constructed spectral indices, can be used to distinguish between evergreen and deciduous vegetation. The integration of multiple satellite images over time helps capture the phenology of different vegetation types while mitigating the influence of outliers (Carrasco et al., 2019; Pizarro et al., 2022; Tu et al., 2020; Verde et al., 2020; Xie et al., 2019).*

*However, relying solely on median composited bands of Sentinel-2 and constructed spectral indices may not be sufficient to achieve high classification accuracy, emphasizing the importance of multisource data. Notably, elevation is the most important feature among all ancillary ones (Fig. A1), reflecting the natural distribution of vegetation types, which are predominantly shaped by latitudinal zonation in the mountainous TP (Sherman et al., 2008) (Fig. A5 and Fig. 7). Thus, leveraging features derived from multisource data allows us to amplify and capture differences between evergreen and deciduous vegetation, as well as between shrubs and woodlands, ultimately leading to a high classification accuracy (Xu et al., 2018; J. Yan et al., 2023).*

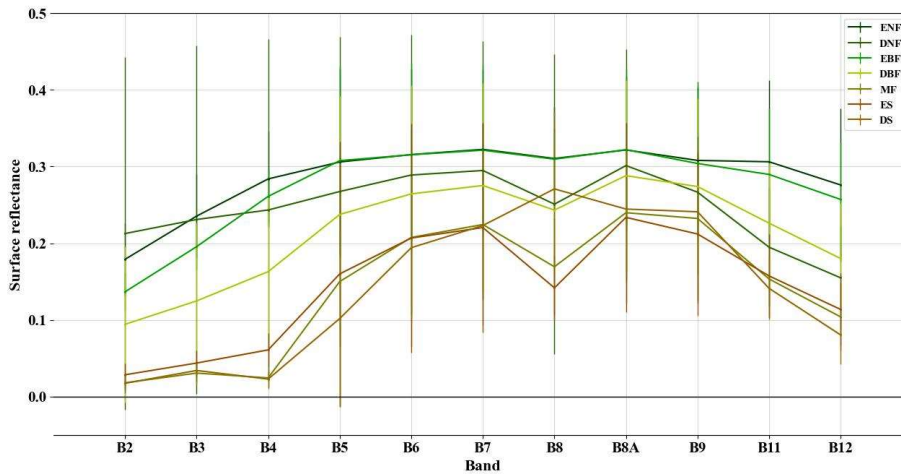

Figure A4. Sentinel-2 spectral curves for forest and shrubland types. The spectral curve for each type was derived by calculating the average and standard deviation of surface reflectance across all samples for the processed cloud-free Sentinel-2 median composite for 2022 in the Tibetan Plateau. ENF: evergreen needle-leaved forest; DNF: deciduous needle-leaved forest; EBF: evergreen broadleaved forest; DBF: deciduous broadleaved forest; MF: mixed forest; ES: evergreen shrubland; DS: deciduous shrubland.

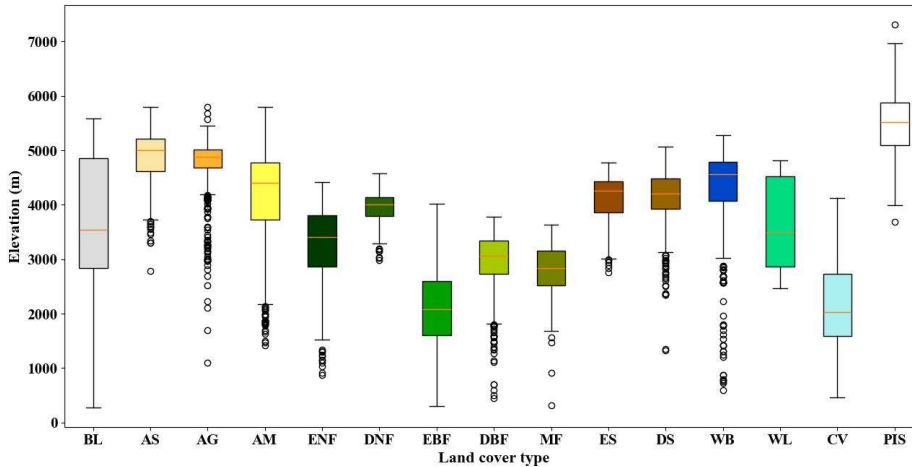

Figure A5. Box plot derived from SRTM for the distribution of sample elevation across different land cover types in the Tibetan Plateau. BL: bare land; AS: alpine scree; AG: alpine grassland; AM: alpine meadow; ENF: evergreen needle-leaved forest; DNF: deciduous needle-leaved forest; EBF: evergreen broadleaved forest; DBF: deciduous broadleaved forest; MF: mixed forest; ES: evergreen shrubland; DS: deciduous shrubland; WB: water body; WL: wetland; CV: cultivated vegetation; PIS: permanent ice and snow.



## Reference:

- Immitzer, M., Vuolo, F., & Atzberger, C. (2016). First Experience with Sentinel-2 Data for Crop and Tree Species Classifications in Central Europe. *Remote Sensing*, 8(3), 166. <https://doi.org/10.3390/rs8030166>
- Carrasco, L., O'Neil, A., Morton, R., & Rowland, C. (2019). Evaluating Combinations of Temporally Aggregated Sentinel-1, Sentinel-2 and Landsat 8 for Land Cover Mapping with Google Earth Engine. *Remote Sensing*, 11(3), 288. <https://doi.org/10.3390/rs11030288>
- Pizarro, S. E., Pricope, N. G., Vargas-Machuca, D., Huanca, O., & Ñaupari, J. (2022). Mapping Land Cover Types for Highland Andean Ecosystems in Peru Using Google Earth Engine. *Remote Sensing*, 14(7), 1562. <https://doi.org/10.3390/rs14071562>
- Tu, Y., Lang, W., Yu, L., Li, Y., Jiang, J., Qin, Y., Wu, J., Chen, T., & Xu, B. (2020). Improved Mapping Results of 10 m Resolution Land Cover Classification in Guangdong, China Using Multisource Remote Sensing Data With Google Earth Engine. *IEEE Journal of Selected Topics in Applied Earth Observations and Remote Sensing*, 13, 5384–5397. <https://doi.org/10.1109/JSTARS.2020.3022210>
- Verde, N., Kokkoris, I. P., Georgiadis, C., Kaimaris, D., Dimopoulos, P., Mitsopoulos, I., & Mallinis, G. (2020). National Scale Land Cover Classification for Ecosystem Services Mapping and Assessment, Using Multitemporal Copernicus EO Data and Google Earth Engine. *Remote Sensing*, 12(20), 3303. <https://doi.org/10.3390/rs12203303>
- Xie, S., Liu, L., Zhang, X., Yang, J., Chen, X., & Gao, Y. (2019). Automatic Land-Cover Mapping using Landsat Time-Series Data based on Google Earth Engine. *Remote Sensing*, 11(24), 3023. <https://doi.org/10.3390/rs11243023>
- Sherman, R., Mullen, R., Haomin, L., Zhendong, F., & Yi, W. (2008). Spatial patterns of plant diversity and communities in Alpine ecosystems of the Hengduan Mountains, northwest Yunnan, China. *Journal of Plant Ecology*, 1(2), 117–136. <https://doi.org/10.1093/jpe/rtn012>
- Xu, Z., Chen, J., Xia, J., Du, P., Zheng, H., & Gan, L. (2018). Multisource Earth Observation Data for Land-Cover Classification Using Random Forest. *IEEE Geoscience and Remote Sensing Letters*, 15(5), 789–793. <https://doi.org/10.1109/LGRS.2018.2806223>
- Yan, J., Liu, J., Liang, D., Wang, Y., Li, J., & Wang, L. (2023). Semantic Segmentation of Land Cover in Urban Areas by Fusing Multisource Satellite Image Time Series. *IEEE Transactions on Geoscience and Remote Sensing*, 61, 1–15. <https://doi.org/10.1109/TGRS.2023.3329709>

## 6. Finally, does this paper introduce any methodological innovations? Please endeavor to highlight the novel aspects of this study.

### Reply 6:

Indeed, the classification methods we used to generate the land cover map are widely used but also well recognized in the research community. We believe that in the current stage, with the rapid advance of machine learning algorithms and computing power, the size, accuracy, and separability of the training samples are more important

than the classification algorithms employed. Therefore, in this study, we emphasize more on bridging the gaps between existing land cover products and the requirements of ecologically meaningful applications in TP, that is, the new classification system. Yet, we also tested several machine-learning algorithms and selected the best one to achieve high classification accuracy. Furthermore, our methodology is meticulously crafted, comprehensive, and resilient.

Land cover mapping research holds paramount importance in Earth science, and our datasets, encompassing the land cover map and samples for the TP, can serve as a robust foundation for further research endeavors in this pivotal region. For this, we strengthened our discussion in terms of its implications for the sustainable use of available resources in practice, for policy making, and for further research (Lines 312-340), which reads:

### **1. For sustainable use of available resources in practice:**

*Lakes and glaciers are the sentinels of global climate change and constitute the foundation of the TP as a crucial water source for surrounding regions (G. Zhang et al., 2017; G. Zhang & Duan, 2021). Precisely extracting the boundaries of lakes and glaciers is imperative for quantitatively monitoring lake expansion and glacier melting, as well as understanding the dynamic relationship between them and precipitation (Tong et al., 2016; J. Zhang et al., 2021; R. Zhao et al., 2022). Our land cover data, samples, and mapping methodology can serve as a baseline support for these endeavors (Korzeniowska & Korup, 2017; Yan et al., 2020), which facilitates the effective utilization of available water resources and promotes the sustainable development of the economy and society in the Greater Tibetan Plateau area and downstream regions of rivers originating from the TP (Ding et al., 2019).*

### **2. For policy making:**

*Alpine forests play a crucial role in carbon storage and sequestration, thereby enhancing ecosystem services in the TP (Lin et al., 2023; Z. Wang et al., 2022; H. Zhao et al., 2023). Our study revealed that TP\_LC10-2022 identified the smallest forested area (8.60%), while GLC\_FCS30-2020 and FROM\_GLC30-2015 classified the largest and second-largest areas of alpine forest, respectively (12.86% and 11.89%) (Table A4). Conversely, the area of shrubland exhibits nearly the opposite trend (Table A4). Confusion also arises between alpine grassland and bare land, potentially leading to variations in carbon storage estimation within each vegetation type. These discrepancies could impact efforts related to forest resource protection and grassland management for animal husbandry (J. Li et al., 2020; C. Yu et al., 2022).*

### **3. For further research:**

*Alpine screes are extensively distributed across the TP, yet they are frequently disregarded from other products. Our product presents the initial description of alpine*

*scree vegetation locations, which will contribute to environmental monitoring and biodiversity research in the periglacial zone of the TP (X.-H. Li et al., 2014). Shrublands play a vital role as carbon sinks in ecosystems and hold substantial implications for biomass estimation and global carbon cycling (Ma et al., 2021; Nie et al., 2018). TP\_LC10-2022 accurately predicts the spatial distribution of shrublands, which holds considerable importance in forecasting the impact of future changes in the biomass and carbon cycle on global-scale ecosystems (Chang et al., 2022).*

*High-resolution and accurate land cover data encompassing diverse vegetation types are crucial for monitoring large-scale alpine vegetation dynamics (F. Wang et al., 2023; Z. Wang et al., 2020, 2022). For instance, relying on land cover maps such as ESA WorldCover as the foundation to examine tree lines and vegetation lines in the TP may lead to the underestimation of tree lines due to misclassifications of grasslands and shrublands (Fig. 7) (Zou et al., 2023). Additionally, the vegetation line may also be underestimated because of the absence of alpine scree (Fig. 7). In our future work, we aim to leverage the Sentinel-2, Sentinel-1, and other multisource data to annually generate TP\_LC10 products. This approach will facilitate alpine vegetation monitoring and change detection, thereby enriching our comprehension of the dynamic TP amidst intensifying global climate change (Y. Wang et al., 2022).*

#### **References:**

- Chang, Q., Zwieback, S., DeVries, B., & Berg, A. (2022). Application of L-band SAR for mapping tundra shrub biomass, leaf area index, and rainfall interception. *Remote Sensing of Environment*, 268, 112747. <https://doi.org/10.1016/j.rse.2021.112747>
- Ding, X., Zhang, Z., Wu, F., & Xu, X. (2019). Study on the Evolution of Water Resource Utilization Efficiency in Tibet Autonomous Region and Four Provinces in Tibetan Areas under Double Control Action. *Sustainability*, 11(12), 3396. <https://doi.org/10.3390/su11123396>
- Korzeniowska, K., & Korup, O. (2017). Object-Based Detection of Lakes Prone to Seasonal Ice Cover on the Tibetan Plateau. *Remote Sensing*, 9(4), 339. <https://doi.org/10.3390/rs9040339>
- Li, J., Gong, J., Guldman, J.-M., Li, S., & Zhu, J. (2020). Carbon Dynamics in the Northeastern Qinghai–Tibetan Plateau from 1990 to 2030 Using Landsat Land Use/Cover Change Data. *Remote Sensing*, 12(3), 528. <https://doi.org/10.3390/rs12030528>
- Li, X.-H., Zhu, X.-X., Niu, Y., & Sun, H. (2014). Phylogenetic clustering and overdispersion for alpine plants along elevational gradient in the Hengduan Mountains Region, southwest China: Phylogenetic structure along elevational gradient. *Journal of Systematics and Evolution*, 52(3), 280–288. <https://doi.org/10.1111/jse.12027>
- Lin, Y., Xiao, J.-T., Kou, Y.-P., Zu, J.-X., Yu, X.-R., & Li, Y.-Y. (2023). Aboveground carbon sequestration rate in alpine forests on the eastern Tibetan Plateau: Impacts of future forest management options. *Journal of Plant Ecology*, 16(3), rtad001. <https://doi.org/10.1093/jpe/rtad001>

- Ma, H., Mo, L., Crowther, T. W., Maynard, D. S., van den Hoogen, J., Stocker, B. D., Terrer, C., & Zohner, C. M. (2021). The global distribution and environmental drivers of aboveground versus belowground plant biomass. *Nature Ecology & Evolution*, 5(8), 1110–1122. <https://doi.org/10.1038/s41559-021-01485-1>
- Nie, X., Yang, L., Xiong, F., Li, C., Fan, L., & Zhou, G. (2018). Aboveground biomass of the alpine shrub ecosystems in Three-River Source Region of the Tibetan Plateau. *Journal of Mountain Science*, 15(2), 357–363. <https://doi.org/10.1007/s11629-016-4337-0>
- Tong, K., Su, F., & Xu, B. (2016). Quantifying the contribution of glacier meltwater in the expansion of the largest lake in Tibet. *Journal of Geophysical Research: Atmospheres*, 121(19). <https://doi.org/10.1002/2016JD025424>
- Wang, F., Ma, Y., Darvishzadeh, R., & Han, C. (2023). Annual and Seasonal Trends of Vegetation Responses and Feedback to Temperature on the Tibetan Plateau since the 1980s. *Remote Sensing*, 15(9), 2475. <https://doi.org/10.3390/rs15092475>
- Wang, Y., Li, D., Ren, P., Ram Sigdel, S., & Camarero, J. J. (2022). Heterogeneous Responses of Alpine Treelines to Climate Warming across the Tibetan Plateau. *Forests*, 13(5), 788. <https://doi.org/10.3390/f13050788>
- Wang, Z., Song, W., & Yin, L. (2022). Responses in ecosystem services to projected land cover changes on the Tibetan Plateau. *Ecological Indicators*, 142, 109228. <https://doi.org/10.1016/j.ecolind.2022.109228>
- Wang, Z., Wu, J., Niu, B., He, Y., Zu, J., Li, M., & Zhang, X. (2020). Vegetation Expansion on the Tibetan Plateau and Its Relationship with Climate Change. *Remote Sensing*, 12(24), 4150. <https://doi.org/10.3390/rs12244150>
- Yan, D., Huang, C., Ma, N., & Zhang, Y. (2020). Improved Landsat-Based Water and Snow Indices for Extracting Lake and Snow Cover/Glacier in the Tibetan Plateau. *Water*, 12(5), 1339. <https://doi.org/10.3390/w12051339>
- Yu, C., Xu, L., Li, M., & He, N. (2022). Phosphorus storage and allocation in vegetation on the Tibetan Plateau. *Ecological Indicators*, 145, 109636. <https://doi.org/10.1016/j.ecolind.2022.109636>
- Zhang, G., & Duan, S. (2021). Lakes as sentinels of climate change on the Tibetan Plateau. *All Earth*, 33(1), 161–165. <https://doi.org/10.1080/27669645.2021.2015870>
- Zhang, G., Yao, T., Piao, S., Bolch, T., Xie, H., Chen, D., Gao, Y., O'Reilly, C. M., Shum, C. K., Yang, K., Yi, S., Lei, Y., Wang, W., He, Y., Shang, K., Yang, X., & Zhang, H. (2017). Extensive and drastically different alpine lake changes on Asia's high plateaus during the past four decades. *Geophysical Research Letters*, 44(1), 252–260. <https://doi.org/10.1002/2016GL072033>
- Zhang, J., Hu, Q., Li, Y., Li, H., & Li, J. (2021). Area, lake-level and volume variations of typical lakes on the Tibetan Plateau and their response to climate change, 1972–2019. *Geo-Spatial Information Science*, 24(3), 458–473. <https://doi.org/10.1080/10095020.2021.1940318>
- Zhao, H., Guo, B., & Wang, G. (2023). Spatial–Temporal Changes and Prediction of Carbon Storage in the Tibetan Plateau Based on PLUS-InVEST Model. *Forests*, 14(7), 1352. <https://doi.org/10.3390/f14071352>
- Zhao, R., Fu, P., Zhou, Y., Xiao, X., Grebby, S., Zhang, G., & Dong, J. (2022). Annual 30-m big Lake Maps of the Tibetan Plateau in 1991–2018. *Scientific Data*, 9(1), 164.

<https://doi.org/10.1038/s41597-022-01275-9>

Zou, L., Tian, F., Liang, T., Eklundh, L., Tong, X., Tagesson, T., Dou, Y., He, T., Liang, S., & Fensholt, R. (2023). Assessing the upper elevational limits of vegetation growth in global high-mountains. *Remote Sensing of Environment*, 286, 113423.

<https://doi.org/10.1016/j.rse.2022.113423>
